# Supplementary material for: The PB2 Polymerase Host Adaptation Substitutions Prime Avian Indonesia Sub Clade 2.1 H5N1 Viruses for Infecting Humans
Source: MDPI journal article supplement (doi:10.3390/v11030292), 2019-03-22
Supplement: s1 [file s1]

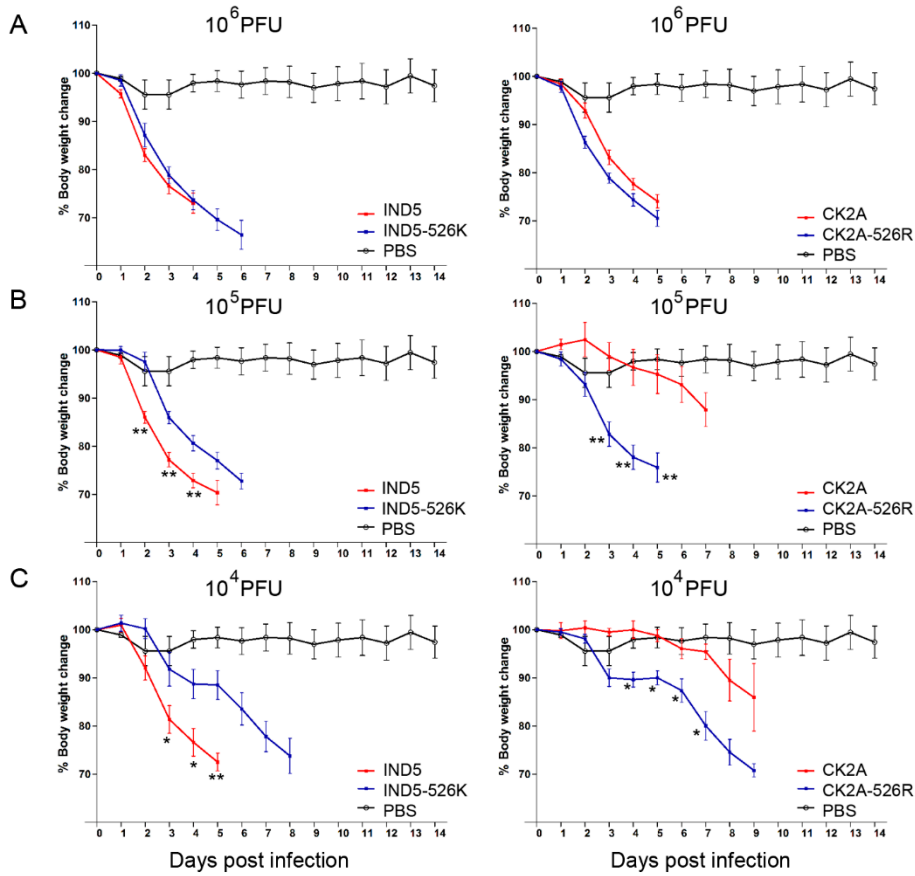

**Figure S1. H5N1 virus infection in mice.**

Groups of four or six BALB/c mice, aged 4-6 weeks, were intranasally inoculated with  $10^6$  (A),  $10^5$  (B) or  $10^4$  (C) PFU of wild type IND5 or CK2A, or 526K (IND5-526K) or 526R (CK2A-526R) mutant viruses, in 25ul PBS. Body weight and survival were monitored daily for 14 days after infection. Error bars represent data of standard deviation from different virus-infected mouse. Statistical significance was analyzed by one-way ANOVA or Student's t-test \*\*\*p<0.001, \*\*p<0.01 and \*p<0.05
